# Supplementary material
Source: publisher figshare collection journal article supplement (https://gsajournals.figshare.com/ndownloader/files/22717463)
Supplement: Supplementary file 1 [file 22717463]

**List of supplemental materials**

Supplemental Table S1. Known causal genes and their orthologs in major model plants and crop species.

Supplemental Table S2. External validation of ortholog-trained Arabidopsis and rice model using known causal genes in Arabidopsis and rice.

Supplemental Table S3. The average value of features used for the Arabidopsis model.

Supplemental Table S4. The average value of features used for the rice model.

Supplemental Table S5. The number of prioritized genes at different cutoffs for the sorghum and Setaria QTLs included in this study.

Supplemental Table S6. Function annotation, gene expression data, and protein sequence differences of the thirteen candidates prioritized by QTG-Finder2 and SD1.

Supplemental Table S7. Putative transcription factor binding sites identified in the promoter of Sevir.5G394900.

Supplemental Figure S1. Whole-genome synteny map between *Setaria viridis* and *Setaria italica* by SynMap.

Supplemental Figure S2. Parameter tuning for the *Setaria viridis* model based on cross-validation AUC-ROC.

Supplemental Figure S3. Parameter tuning for the *Sorghum bicolor* model based on cross-validation AUC-ROC.

Supplemental Figure S4. Causal-gene orthologs in 12 major crops and model species. (A) Across species, a similar percentage of causal genes have orthologs. (B) The average number of orthologs varies across species.
Supplemental Figure S5. Models trained with different groups of orthologs performed similarly according to external validation. (A) The number of orthologs identified with different thresholds. (B) Model performance when using the orthologs identified by different sets of orthologs.

Supplemental Figure S6. Importance of the newly added features to the Arabidopsis and rice models.

Supplemental Figure S7. Multiple sequence alignment for a RIO2 protein across grass species, yeast and human using Clustal Omega (v1.2.4).

Supplemental Figure S8. Multiple sequence alignment for a RIO2 protein across grass species using Clustal Omega (v1.2.4).

Supplemental Figure S9. Multiple sequence alignment of a candidate gene *SD1* across grass species using Clustal Omega (v1.2.4).

Supplemental Figure S10. A candidate gene encoding a ribosomal protein in the L1P family has higher expression in *Setaria italica* (Seita.5G389700)than in *Setaria viridis* (Sevir.5G394900)*.*

Supplemental Figure S11. Pairwise sequence alignment shows polymorphisms in the putative promoters of an ortholog pair of genes encoding L1P ribosomal proteins.
